# Supplementary material for: Elevated m 6 A RNA Modifications Associate with Immune Dysregulation and Cancer in People with HIV-1
Source: Research Square preprint supplement (doi:10.21203/rs.3.rs-8070380/v1), 2026-01-13
Supplement: Supplementary file 1 [file 4a627142fb05ebbad2069ca1.docx]

| **Table 1. Details of PBMC samples from de-identified PLWH with cancer** | | | | | | | | | | | | | |
| --- | --- | --- | --- | --- | --- | --- | --- | --- | --- | --- | --- | --- | --- |
| Participant | Age | Gender | HIV-1 viral load (RNA copies/mL) | CD4+ T cell count/mm3 blood | Cancer type a | Cancer stage | Treatment stage and type | ART regimen | | Drugs of abuse | | Marijuana use | |
| 1 b | 40 | M c | 115,037 | 24 | KS d | High Risk | None | None | | Unknown | | Unknown | |
| 2 | 45 | M | 67,633 | 236 | KS | Low Risk | None | None | | Unknown | | Unknown | |
| 3 | 46 | M | 99,139 | 195 | KS | Low Risk | None | None | | Unknown | | Unknown | |
| 4 | 45 | M | 54,766 | 31 | KS | High Risk | None | None | | Unknown | | Unknown | |
| 5 | 55 | M | 17,078 | 14 | KS | High Risk | None | None | | Unknown | | Unknown | |
| 6 | 40 | M | 248,068 | 64 | KS | High Risk | None | None | | Unknown | | Unknown | |
| 7 | 48 | M | 400 | 223 | KS | Low Risk | ART ~2.5 mos prior to sample collection | lopinavir/ritonavir and emtricitabine/  tenofovir | | Unknown | | Unknown | |
| 8 e | 82 | M | 148 | 606 | Prostate cancer | Remission | Prostatectomy 2006 | Biktarvy | | No | | No | |
| 9 | 54 | F f | S g | 1,497 | Hodgkin’s disease | Remission | Splenectomy, 1980s | Biktarvy | | Yes, many | | Yes | |
| 10 | 68 | M | S | 885 | Non-melanocytic skin cancer | Cured | Surgical removal | Biktarvy | | No | | Yes | |
| 11 | 59 | M | 30 | 262 | KS | Remission | Diagnosed 2012-  responded to ART | Biktarvy | | Yes | | No | |
| 12 | 69 | M | 139 | 506 | Large B cell lymphoma | Remission | Treated with RCHOP 2023 | Biktarvy | | No | | Yes | |
| 13 | 60 | F | S | 941 | Vulvar cancer, Anal squamous cell x 3 | remission, active | Resected 2022, lymph node resection, XRT, Resected 2024-2025 | Juluca | | No | | No | |
| 14 | 58 | M | S | 703 | Anal dysplasia | Removed | Resected 2016 | Biktarvy | | No | | No | |
| 15 | 68 | F | 11,500 | 718 | Lung cancer | Resected | Adenocarcinoma, resected and XRT 2022-2023 | Biktarvy | | Yes, remote | | No | |
| **Mean ± SD** | **56 ± 12** |  | **55,813 ± 72,821** | **460 ± 414** |  |  |  | |  | |  | |  |

Only de-identified information is shown in the table. The informed consent to participate was obtained from all of the participants.

a Cancer present or being treated at time of blood acquisition. b Samples from participants 1-7 were provided by the AIDS and Cancer Specimen Resource funded by the National Cancer Institute, NIH; Cancer stage is based on ACTG Staging for KS using tumor extent, immune status, and systemic illness factors. c M: male. d KS: Kaposi sarcoma. e Samples from participants 8-15 were provided by the University of Iowa HIV Clinic. f F: female. g S: HIV-1 RNA suppressed (viral load ≤ 20 copies/mL).

**Table 2. Details of PBMC samples from de-identified PLWH without cancer**

| Participant ID | Age | Gender | HIV-1 viral load (RNA copies/mL) | CD4+ T cell count/mm3 blood | ART regimen | Drugs of abuse | Marijuana use |
| --- | --- | --- | --- | --- | --- | --- | --- |
| 1 a | 54 | M b | 40 | 511 | Lamivudine/Zidovudine/Nevirapine | No | No |
| 2 | 52 | M | 60,785 | 154 | None | No | No |
| 3 | 61 | F c | 100 | 428 | Lamivudine/Zidovudine/Nevirapine | No | No |
| 4 | 55 | M | 100 | 485 | Lamivudine/Zidovudine/Efavirenz | No | No |
| 5 | 61 | F | 66,714 | 337 | None | No | No |
| 6 | 62 | M | 112,030 | 211 | None | No | No |
| 7 d | 60 | M | S e | 661 | Biktarvy | Yes - many | Yes |
| 8 | 53 | M | 35 | 338 | Genvoya | No | Yes |
| 9 | 68 | M | S | 1,400 | Dovato | No | Yes |
| 10 | 66 | M | S | 267 | Juluca | No | Yes |
| 11 | 65 | M | S | 749 | Triumeq | No | No |
| 12 | 61 | M | S | 790 | Descovy+Tivicay | No | No |
| 13 | 60 | M | 39 | 130 | Biktarvy | Yes | Yes |
| 14 | 58 | F | S | 1,667 | Cabenuva | No | No |
| 15 | 57 | M | S | 835 | Dovato | No | No |
| 16 | 55 | M | 133 | 1,059 | Dovato | Yes | Yes |
| 17 | 71 | F | S | 1,078 | Biktarvy | Yes | Yes |
| 18 | 53 | M | S | 338 | Genvoya | No | Yes |
| 19 | 67 | M | 65 | 604 | Biktarvy | No | No |
| 20 | 50 | M | 64 | 846 | Biktarvy | No | No |
| 21 | 61 | M | 31,500 | 147 | Biktarvy | Yes | Yes |
| 22 | 50 | M | 105 | 235 | Biktarvy | No | No |
| 23 | 60 | F | 28 | 634 | Descovy+Tivicay | No | No |
| 24 | 60 | M | S | 832 | Biktarvy | No | No |
| 25 | 64 | M | S | 620 | Biktarvy | No | Yes |
| 26 | 61 | M | 23 | 460 | Odefsey | No | Yes |
| 27 | 60 | M | S | 1,343 | Biktarvy | Yes | No |
| 28 | 60 | M | 296 | 182 | Biktarvy | No | Yes |
| **Mean ± SD** | **60 ± 5** |  | **17,004 ± 32,656** | **619 ± 399** |  |  |  |

Only de-identified information is shown in the table. The informed consent to participate was obtained from all of the participants.

a Samples from participants 1-6 were provided by the AIDS and Cancer Specimen Resource funded by the National Cancer Institute, NIH. b M: male. c F: female. d Samples from participants 7-28 were provided by the University of Iowa HIV Clinic. e S: HIV-1 RNA suppressed (viral load ≤ 20 copies/mL).
